# Supplementary material
Source: Springer Nature journal article supplement (https://www.springermedizin.de/resource/supplementary/12955_2003_13_MOESM1_ESM.pdf/9558372)
Supplement: MOESM1 [file 9558372]

## CLINICAL COPD QUESTIONNAIRE

Please **circle** the number of the response that best describes how you have been feeling during the **past week**.  
(Only **one** response for each question).

| On average, <b>during the past week</b> ,<br>how often did you feel:                                                           | never              | hardly<br>ever        | a few<br>times   | several<br>times   | Many<br>Times | a great<br>many times | almost<br>all the<br>time        |
|--------------------------------------------------------------------------------------------------------------------------------|--------------------|-----------------------|------------------|--------------------|---------------|-----------------------|----------------------------------|
| 1. Short of breath <b>at rest</b> ?                                                                                            | 0                  | 1                     | 2                | 3                  | 4             | 5                     | 6                                |
| 2. Short of breath <b>doing physical Activities</b> ?                                                                          | 0                  | 1                     | 2                | 3                  | 4             | 5                     | 6                                |
| 3. <b>Concerned</b> about getting a cold or your breathing getting worse?                                                      | 0                  | 1                     | 2                | 3                  | 4             | 5                     | 6                                |
| 4. <b>Depressed (down)</b> because of your breathing problems?                                                                 | 0                  | 1                     | 2                | 3                  | 4             | 5                     | 6                                |
| In general, <b>during the past week</b> , how much of the time:                                                                |                    |                       |                  |                    |               |                       |                                  |
| 5. Did you <b>cough</b> ?                                                                                                      | 0                  | 1                     | 2                | 3                  | 4             | 5                     | 6                                |
| 6. Did you <b>produce phlegm</b> ?                                                                                             | 0                  | 1                     | 2                | 3                  | 4             | 5                     | 6                                |
| On average, <b>during the past week</b> , how limited were you in these activities <b>because of your breathing problems</b> : | not limited at all | very slightly limited | slightly limited | moderately limited | very limited  | extremely limited     | totally limited /or unable to do |
| 7. <b>Strenuous physical activities</b> (such as climbing stairs, hurrying, doing sports)?                                     | 0                  | 1                     | 2                | 3                  | 4             | 5                     | 6                                |
| 8. <b>Moderate physical activities</b> (such as walking, housework, carrying things)?                                          | 0                  | 1                     | 2                | 3                  | 4             | 5                     | 6                                |
| 9. <b>Daily activities at home</b> (such as dressing, washing yourself)?                                                       | 0                  | 1                     | 2                | 3                  | 4             | 5                     | 6                                |
| 10. <b>Social activities</b> (such as talking, being with children, visiting friends/ relatives)?                              | 0                  | 1                     | 2                | 3                  | 4             | 5                     | 6                                |
